# Supplementary material for: The C. elegans gonadal sheath Sh1 cells extend asymmetrically over a differentiating germ cell population in the proliferative zone
Source: eLife. 2022 Sep 12;11:e75497. doi: 10.7554/eLife.75497 (PMC9467509; doi:10.7554/eLife.75497)
Supplement: Figure 1—figure supplement 1—source data 1. [file elife-75497-fig1-figsupp1-data1.xlsx]

## Sheet: Figure 1 Supplement B
Distal Sh1 16C--imaged at starting point	Germ cell transition 16C--imaged at starting point	Distal Sh1 25C--imaged at 15 hours	Germ cell transition 25C--imaged at 15 hours
29.68	105.6	37.91	48.69
40.41	84.52	37.53	46.02
32.89	97.14	37.31	47.71
28.01	71.35	44.33	46.85
32.53	87.78	51.27	47.62
33.9	84.49	35.85	43.68
40.82	94.78	39.42	45.37
40.05	95.36	59.26	35.29
28.59	75.93	23.23	27.95
31.88	88.34	23.31	40.37
38.18	84.02	38.08	28.56
39.51	89.4	37.97	39.14
43.97	80.63	48.29	31.02
25	74.07	32.74	44.01
32.34	79.19	45.79	36.99
35.6	82.48	41.43	44.98
41.44	85.36	58.05	33.66
44.18	88.84	58.73	42.25
37.52	93.61	23.7	47.73
23	81.19	40.72	49.98
37.72	70.14	45.43	46.15
30.53	91.27	45.78	41.06
40.81	73.86	46.67	49.92
Distal Sh1 16C--imaged at 21 hours	Germ cell transition 16C--imaged at 21 hours	Distal Sh1 25C--imaged at 15 hours	Germ cell transition 25C--imaged at 15 hours
48.67	60.84	50.16	46.66
35.01	86.79	46.1	43.8
32.81	78.43	33.37	49.92
45.46	83.96	26.82	44.91
42.52	82.39	37.55	46.05
47.62	73.53	40.9	42.51
37.7	79.48	32.6	39.46
50.16	96.38	26.38	39.55
40.02	76.04	53.92	44.51
44.62	72.07	45.05	34.9
24.08	79.61	65.4	45.74
30.29	92.9	22.46	27.96
33.4	67.1	24.12	36.89
38.39	86.62	40.53	51.97
39.88	71.09	39.47	47.26
18.18	80.66	37.71	47.15
44	75.91	43.69	43.63
42.8	91.58
Distal Sh1 16C rep 1--imaged at 18 hours	Distal Sh1 16C - rep 2--imaged at 18 hours	Germ cell transition 16C rep 1--imaged at 18 hours	Germ cell transition 16C -rep 2--imaged at 18 hours	Distal Sh1 25C rep1 -imaged at 15 hours	Distal Sh1 25C - rep 2--imaged at 15 hours	Germ cell transition 25C rep 1--imaged at 15 hours	Germ cell transition 25C - rep 2--imaged at 15 hours
53.932	46.95	92.925	78.08	35.86	6.52	39.937	31.93
45.375	29.63	70.539	79.27	52.125	43.12	42.82	47.92
44.623	46.35	98.783	83.14	39.283	45.26	40.754	51.35
48.788	42.4	94.004	77.7	36.282	44.54	35.49	45.35
47.765	48.28	94.076	77.63	40.037	30.13	41.64	35.78
36.837	32.12	107.772	86.15	40.48	39.63	30.474	46.31
49.052	58.94	75.113	95.92	34.237	47.86	31.614	46.13
28.162	45.4	66.442	84.74	35.156	38.27	34.174	44.22
42.343	50.06	87.807	105.64	46.472	35.41	20.033	38.18
	42.22		73.28	51.791	16.58	38.385	53.52
	43.08		110.93		42.01		43.95
	38.05		96.93		50.8		47.56
	40.75		79.83		46.22		39.01
	16.84		66.36		31.9		37.89
	36.87		92.93		51.07		52.84
	23.39		86.4		50.74		47.74
	30.17		71.31		34.24		37.34
	16.85		61.97		14.84		51.67
	22.82		74.45		33.21		32.53
	29.52		83.26		41.98		46.65
	31.38		73.1		37.38		51.58
					35.72		47.11
					62.2		35.49
					36.09		38.31
emb-30 mut Distal Sh1 16C rep 2--imaged at 21 hours, measured in cell diameters	emb-30 mut Germ cell transition 16C rep 2--imaged at 21 hours, measured in cell diameters	emb-30 mut Distal Sh1 25C rep 2--imaged at 15 hours, measured in cell diameters	emb-30 mut Germ cell transition 25C rep 2--imaged at 15 hours, measured in cell diameters
12	15	15	14
8	22	14	13
8	20	11	17
11	21	9	16
11	20	11	13
12	20	12	12
10	21	11	14
13	24	8	12
10	20	17	14
11	19	12	10
7	21	19	13
7	23	6	8
8	17	6	9
10	22	11	14
10	18	12	14
4	22	10	12
12	21	13	13
12	24
