# Supplementary material for: The C. elegans gonadal sheath Sh1 cells extend asymmetrically over a differentiating germ cell population in the proliferative zone
Source: eLife. 2022 Sep 12;11:e75497. doi: 10.7554/eLife.75497 (PMC9467509; doi:10.7554/eLife.75497)
Supplement: Figure 1—source data 1. [file elife-75497-fig1-data1.xlsx]

## Sheet: Figure 1
Figure 1
emb-30
Distal Sh1 16C	Germ cell transition 16C	Distal Sh1 25C	Germ cell transition 25C
53.932	92.925	35.86	39.937
45.375	70.539	52.125	42.82
44.623	98.783	39.283	40.754
48.788	94.004	36.282	35.49
47.765	94.076	40.037	41.64
36.837	107.772	40.48	30.474
49.052	75.113	34.237	31.614
28.162	66.442	35.156	34.174
42.343	87.807	46.472	20.033
46.95	78.08	51.791	38.385
29.63	79.27	6.52	31.93
46.35	83.14	43.12	47.92
42.4	77.7	45.26	51.35
48.28	77.63	44.54	45.35
32.12	86.15	30.13	35.78
58.94	95.92	39.63	46.31
45.4	84.74	47.86	46.13
50.06	105.64	38.27	44.22
42.22	73.28	35.41	38.18
43.08	110.93	16.58	53.52
38.05	96.93	42.01	43.95
40.75	79.83	50.8	47.56
16.84	66.36	46.22	39.01
36.87	92.93	31.9	37.89
23.39	86.4	51.07	52.84
30.17	71.31	50.74	47.74
16.85	61.97	34.24	37.34
22.82	74.45	14.84	51.67
29.52	83.26	33.21	32.53
31.38	73.1	41.98	46.65
		37.38	51.58
		35.72	47.11
		62.2	35.49
		36.09	38.31
glp-1
Distal Sh1 16C	Germ cell transition 16C	Distal Sh1 25C	Germ cell transition 25C
18.11	91.51	17.01	25.21
37.72	72.43	29.44	33.63
31.03	59.17	36.53	27
37.37	78.65	51.41	26.21
33.82	61.87	31.55	31.12
40.12	42.19	28.26	33.75
20.92	60.61	29.18	23.79
13.75	89.3	36.05	28.82
29.81	61.66	22.61	23.46
27.52	73.1	21.7	23.65
33.14	78.83	36.84	25.76
23.18	53.23	23.62	41.99
26.01	53.63	26.76	9.61
20.47	45.43	20.12	14.68
31.53	64.61	31.33	39.23
39.33	65.51	20.83	27.44
37.53	71.53	33.03	31.36
23.47	40.69	31.39	18.1
		33.1	34.91
		48.3	46.86
		45.17	34.85
