# Supplementary material for: The C. elegans gonadal sheath Sh1 cells extend asymmetrically over a differentiating germ cell population in the proliferative zone
Source: eLife. 2022 Sep 12;11:e75497. doi: 10.7554/eLife.75497 (PMC9467509; doi:10.7554/eLife.75497)
Supplement: Figure 2—source data 1. [file elife-75497-fig2-data1.csv]

inx8	inx9	Ina1::mNG	Cam1::mNG	Lim7::GFP	Lim7::Ced1GFP	Lim7::GFP CAAX
8.105	10.633	13.375	24.339	18.746	19.23	38.686
10.392	11.058	16.461	39.811	19.573	20.58	26.671
10.693	12.403	17.655	43.422	20.098	20.72	66.531
10.963	15.496	18.008	31.928	20.952	22.11	74.403
11.24	20.734	20.454	52.469	22.421	23.27	44.976
12.967	20.827	20.896	29.109	25.481	23.61	88.359
14.514	21.323	21.209	68.819	27.192	27.77	54.309
18.747	22.329	21.798	29.049	27.886	29.83	38.024
18.842	23.409	22.689	18.628	40.474	35.77	80.08
19.374	24.569	23.484	20.6	42.965	36.89	65.108
19.422	25.929	24.082	30.178	48.067	37.99	24.503
20.916	27.687	24.983	31.498	51.707	42.8	64.02
21.175	32.819	25.889	28.283	52.297	43.39	28.214
21.996	34.178	26.033	31.941	55.933	43.95	23.654
24.137	35.324	27.674	36.724	56.944	43.98	113.854
26.148	38.121	27.731	47.061	57.931	44.51	67.363
26.499		28.077	17.86	58.939	44.91	15.845
29.092		28.116	28.123	59.344	45.37	95.404
30.604		30.83	20.702	61.488	45.57	115.34
33.757		31.062	20.293	91.854	46.77	76.518
43.412		31.255	18.054		47.43	77.409
		31.739			47.55
		32.039			47.85
		32.756			48.11
		32.937			48.46
		51.678			48.9
					52.62
					54.87
					55.62
					57.22
					58.36
					58.75
					59.1
					59.34
					59.35
					60.29
					60.71
					62.83
					63.04
					68
					70.63
					74.37
					75.13
					75.71
					83.2
					84.64
					85.25
					85.67
					87.19
					132.6
					144.32
					155.78
