# Supplementary material for: The C. elegans gonadal sheath Sh1 cells extend asymmetrically over a differentiating germ cell population in the proliferative zone
Source: eLife. 2022 Sep 12;11:e75497. doi: 10.7554/eLife.75497 (PMC9467509; doi:10.7554/eLife.75497)
Supplement: Figure 3—source data 1. [file elife-75497-fig3-data1.xlsx]

## Sheet: Intensity vs. Position
Sh1 Position	Sh1 intensity	category
47.43	486.27	DG5020 gap
58.75	599.79	DG5020 gap
58.36	645.81	DG5020 gap
46.77	722.96	DG5020 gap
75.13	871.51	DG5020 gap
62.83	915.91	DG5020 gap
68	1031.24	DG5020 gap
75.71	1088.27	DG5020 gap
54.87	1288.25	DG5020 gap
45.37	1328.42	DG5020 gap
57.22	1328.99	DG5020 gap
85.67	1369.88	DG5020 gap
48.9	1391.12	DG5020 gap
34.63	170	DG5020 interface
43.39	170.58	DG5020 interface
52.62	173.76	DG5020 interface
53.27	187.7	DG5020 interface
39.13	192.01	DG5020 interface
47.85	211.5	DG5020 interface
45.57	212.21	DG5020 interface
19.23	228.92	DG5020 interface
22.11	246.53	DG5020 interface
29.83	345.91	DG5020 interface
38.19	364.13	DG5020 interface
35.77	401.97	DG5020 interface
43.95	758.52	DG5020 interface
48.46	1160.09	DG5020 interface
43.98	1161.19	DG5020 interface
59.35	1197.48	DG5020 interface
60.29	1288.35	DG5020 interface
13.32	156.336	DG5131
24.34	169.056	DG5131
21.01	236.462	DG5131
5.81	311.203	DG5131
15.48	552.066	DG5131
12.24	633.498	DG5131
50.09	734.471	DG5131
20.62	777.737	DG5131
54.86	802.297	DG5131
20.91	1055.19	DG5131
25.34	1151.17	DG5131
13.2	1234.12	DG5131
27.85	1260.61	DG5131
17.11	1809.55	DG5131
