# Supplementary material for: The C. elegans gonadal sheath Sh1 cells extend asymmetrically over a differentiating germ cell population in the proliferative zone
Source: eLife. 2022 Sep 12;11:e75497. doi: 10.7554/eLife.75497 (PMC9467509; doi:10.7554/eLife.75497)
Supplement: Figure 4—source data 1. [file elife-75497-fig4-data1.xlsx]

## Sheet: Figure 4
	file	category		All gonads	Gonad defects	DTC-Sh1 interface	Gap
\\gordonlab.bio.unc.edu\GordonLab\Microscope\Kacy\2021_09_29_lim7pced1gfp_dtcmcherry_STAGED	defect_1	defect		72	16	30	26
	defect_2	defect
	defect_3	defect
	defect_4	defect
	defect_6	defect
	defect1	defect
	defect2	defect
	defect3	defect
	defect4	defect
	defect5	defect
	defect6	defect
	defect1	defect
	defect2	defect
	defect3	defect
	defect4	defect
	defectheadconstriction	defect
	disappearingSh1_normal_YA_moving_3	gap
	disappearingSh1_normal_YA_9	gap
	disappearingSh1_normal YA_10	gap
	disappearingSh1_normal YA_14	gap
	GAPnormal YA_4	gap
	GAPnormal YA_15	gap
	GAPnormal YA_16	gap
	smgap_normal YA_3	gap
	smgap_normal YA_7	gap
\\gordonlab.bio.unc.edu\GordonLab\Microscope\Kacy\2021_10_05_DG5020ced1gfp_dtc	smgap_normal YA_13	gap
	smgap_normal YA_18	gap
	disappearingSh1_normal_YA3	gap
	_2	gap
	_3	gap
	_8	gap
	_10a	gap
	_10b	gap
	_11	gap
\\gordonlab.bio.unc.edu\GordonLab\Microscope\Kacy\2021_10_06_DG5020ced1gfp_dtc	_12	gap
	_16	gap
	_17	gap
	_18 disappearing Sh1	gap
	_19	gap
	_23	gap
	_24	gap
	_29	gap
	nogap_normal YA moving_1	interface
	nogap_normal YA moving_2	interface
	nogap_normal YA_2	interface
	nogap_normal YA_5	interface
	nogap_normal YA_8	interface
	nogap_normal YA_11	interface
	nogap_normal YA_12	interface
	nogap_normal YA_17	interface
	nogap_slightly short gonad_1	interface
	nogap_normal_YA_1	interface
	smgap_normal_YA_2	interface
	nogap_normal_YA_4	interface
	5020_normal_YA_1	interface
	_7	interface
	_9 disappearing Sh1	interface
	_13	interface
	_14	interface
	_15 disappearing Sh1	interface
	_20	interface
	_21	interface
	_22	interface
	_25 disappearing Sh1	interface
	_28 disappearing sh1	interface
	_30	interface
	_31	interface
	_32bottom	interface
	_33 same animal as 32 disappearing sh1	interface
	_34	interface
	_36	interface
	_37 disappearing Sh1	interface
