# Supplementary material for: The C. elegans gonadal sheath Sh1 cells extend asymmetrically over a differentiating germ cell population in the proliferative zone
Source: eLife. 2022 Sep 12;11:e75497. doi: 10.7554/eLife.75497 (PMC9467509; doi:10.7554/eLife.75497)
Supplement: Figure 5—source data 1. [file elife-75497-fig5-data1.xlsx]

## Sheet: Figure 5 Source Data
N2 PZ	N2 gonad length	NK2571-8 PZ	NK2571 gonad length	DG5020 PZ	DG5020 gonad length	DG5131 PZ	DG5131 gonad length			N2 mitotic figures	NK2571 mitotic figures	DG5020 mitotic figures	DG5131 mitotic figures
70.048	656.19	103.04	650	109.3	632.46	74.72	544.56			5	4	4	1
91.267	563.06	95.44	635.85	93.64	639.28	65.39	700.83			3	4	4	3
91.549	756.33	84.35	701.13	97.53	627.67	70.63	588.75			6	6	2	1
98.815	684.48	114.89	621.55	85.97	681.16	68.82	490.87			6	4	3	4
99.252	715.29	109.27	644.56	105.71	654.88	70.69	606.77			5	5	2	3
99.597	621.59	96.92	639.37	95.51	611.79	57.99	534.8			2	8	4	4
99.688	658.42	138.82	571.26	83.91	626.43	57.31	521.02			5	6	4	6
100.884	617.3	107.41	572.49	97.98	627.37	66.9	638.11			6	5	1	2
101.952	628.64	83.71	586.1	114.37	616.85	73.29	593.04			8	8	6	2
102.599	737.01	131.12	643.88	144.2	697.73	61.85	588.18			5	4	3	3
103.065	754.87	104.01	677.9	89.69	639.93	80.57	696.92			6	7	2	2
104.23	653.81	126.343	678.88	74.49	643.75	59.8	655.55			8	4	1	1
104.562		114.919	684.06	85.54	604.84	51.96	637.87			6	10	3	2
104.723		105.463	711.99	91.55	597.87	62.42	377.97			4	2	4	1
105.643		114.14	602.9	106.8	675.31	93.21	704.98			4	4	1	1
108.832		102.96	622.66	87.69	603.71	80.99	570.4			9	5	5	5
108.854		101.42	625.56	104.52	550.69	87.15	336.34			4	2	8	4
109.139		98.07		84.39	634.69	71.88	555.8			7	8	4	3
110.528		115.62		75.21	625.71	78.11	529.76			8	12	3	5
114.465		124.43		90.75		96.45	636.23			4	3	4	2
115.368		100.35		83.77		100.37				6	5	1	4
115.882		104.41		107.26		78.57				6	5	3	3
116.772		93.59		95.03		84.68				6	7	5	4
116.812		101.37		83.91		92.76				3	2	5	4
117.148		97.11		111.16		92.63				4	2	3	3
117.167		116.06		108.45		76.32				5	8	6	3
117.807		130.15		109.47		101.87				3	6	4	1
118.251		118.24		85.12		90.55				5	3	3	2
118.354		123.93		98.34		85.97				4	3	3	0
118.87		108.64		85.27		65.32				7	4	3	5
122.802		94.55		74.08		77.44				2	5	1	3
123.02		107.07		80.07		81.32				8	6		3
123.156		101.34		112.52		101.36				3	5		8
124.211		100.83		87.98		79.44				4	3		5
130.874		97.49		86.84		80.43				6	5		0
133.479		116.78		34.41		73.35				8	4		8
139.319		81.56		85.34		61.64				2			2
72.28		111.76		85.43		89.87				15			1
107.08		94.5		73.74		100.06				6			5
90.87		108.82		33.59		82.15				3			6
128.21		88.86				85.83				7			5
122.53		100.88				63.66				1			6
113.04		110.54				84.35				4
105.04		108.51				100.82				5
101.27		106.42				75.92				3
115.3		105.66								1
97.19		96.47								3
101.46		101.16								2
115.38		107.72								6
108.82										3
108.65										1
100.9										2
96.67										8
114.18										2
106.66										1
103.94										5
107.78										2
94.89										5
99.21										4
105.59										0
137.89										3
93.47										1
103.49										3
95.19										6
109.42										7
123.78										4
128.49										5
101.47
